# Supplementary material for: Effects of smoke-free air law on acute myocardial infarction hospitalization in Indianapolis and Marion County, Indiana
Source: PubMed Central journal article supplement (PMC5810184; doi:10.1186/s12889-018-5153-y), 2018-02-09
Supplement: 12889_2018_5153_MOESM1_ESM.pdf [file 12889_2018_5153_MOESM1_ESM.pdf]

## Supplementary Materials

**Table S1.** Marion County population by sex and age

| Year   | Total Residents of Marion County* | Residents of Marion County by age* |        |        | Female Residents of Marion County* |        |        | Male Residents of Marion County* |        |        |
|--------|-----------------------------------|------------------------------------|--------|--------|------------------------------------|--------|--------|----------------------------------|--------|--------|
|        |                                   | <65                                | 65-74  | >=75   | <65                                | 65-74  | >=75   | <65                              | 65-74  | >=75   |
| 2007   | 878,191                           | 784,938                            | 47,621 | 45,632 | 404,731                            | 24,554 | 23,529 | 380,207                          | 23,067 | 22,103 |
| 2008   | 883,107                           | 788,646                            | 48,838 | 45,623 | 406,567                            | 25,177 | 23,520 | 382,079                          | 23,661 | 22,103 |
| 2009   | 890,878                           | 795,959                            | 49,561 | 45,358 | 410,267                            | 25,546 | 23,379 | 385,692                          | 24,015 | 21,979 |
| 2010   | 904,789                           | 808,390                            | 50,842 | 45,557 | 418,421                            | 26,316 | 23,580 | 389,969                          | 24,526 | 21,977 |
| 2011   | 911,296                           | 814,130                            | 51,663 | 45,503 | 421,428                            | 26,743 | 23,554 | 392,702                          | 24,920 | 21,949 |
| 2012** | 912,089                           | 812,849                            | 54,137 | 45,103 | 420,383                            | 27,998 | 23,326 | 392,466                          | 26,139 | 21,777 |
| 2013   | 913,200                           | 812,045                            | 56,112 | 45,043 | 419,625                            | 28,996 | 23,276 | 392,420                          | 27,116 | 21,767 |
| 2014   | 914,475                           | 813,571                            | 56,814 | 44,090 | 419,993                            | 29,329 | 22,761 | 393,578                          | 27,485 | 21,329 |

\*Populations are estimates obtained from Marion County Health Department

\*\*Ordinance

Year

**Table S2.** Marion County population by race and age

| Year   | Black Residents of Marion County* |        |        | White Residents of Marion County* |        |        |
|--------|-----------------------------------|--------|--------|-----------------------------------|--------|--------|
|        | <65                               | 65-74  | >=75   | <65                               | 65-74  | >=75   |
| 2007   | 201,627                           | 12,232 | 11,721 | 512,973                           | 31,121 | 29,821 |
| 2008   | 203,674                           | 12,613 | 11,782 | 511,124                           | 31,652 | 29,568 |
| 2009   | 206,229                           | 12,841 | 11,752 | 511,905                           | 31,874 | 29,171 |
| 2010   | 220,540                           | 13,870 | 12,429 | 492,262                           | 30,960 | 27,742 |
| 2011   | 220,349                           | 13,983 | 12,316 | 495,792                           | 31,462 | 27,711 |
| 2012** | 224,439                           | 14,948 | 12,454 | 486,375                           | 32,393 | 26,988 |
| 2013   | 226,304                           | 15,637 | 12,553 | 480,731                           | 33,218 | 26,665 |
| 2014   | 228,821                           | 15,979 | 12,401 | 476,312                           | 33,262 | 25,813 |

\*Populations are estimates obtained from Marion County Health Department

\*\*Ordinance Year
